# Supplementary material for: The FBXO32/ATR/ATM axis acts as a molecular switch to control the sensitivity of osteosarcoma cells to irradiation through its regulation of EXO1 expression
Source: Research Square preprint supplement (doi:10.21203/rs.3.rs-1929572/v2), 2022-09-19
Supplement: Supplementary file 1 [file 4fcc6c9d9c31020c62cc03ab.docx]

| Pathway ID | Name | Count | % | FDR | Genes |
| --- | --- | --- | --- | --- | --- |
| [hsa04110](https://www.kegg.jp/kegg-bin/show_pathway?hsa04110) | Cell cycle | 5 | 4.1 | 8.09e-06 | RBL1,SKP2,CCNA2,MCM4,PLK1 |
| [hsa04914](https://www.kegg.jp/kegg-bin/show_pathway?hsa04914) | Progesterone-mediated oocyte maturation | 3 | 3.2 | 0.0023 | CCNA2,PLK1,AURKA |
| [hsa03430](https://www.kegg.jp/kegg-bin/show_pathway?hsa03430) | Mismatch repair | 2 | 8.7 | 0.0031 | RFC5,EXO1 |
| [hsa04218](https://www.kegg.jp/kegg-bin/show_pathway?hsa04218) | Cellular senescence | 2 | 1.9 | 0.0049 | RBL1, CCNA2, |
| [hsa03030](https://www.kegg.jp/kegg-bin/show_pathway?hsa03030) | DNA replication | 3 | 5.6 | 0.0049 | RFC5,MCM4, EXO1 |
| [hsa05203](https://www.kegg.jp/kegg-bin/show_pathway?hsa05203) | Viral carcinogenesis | 3 | 1.6 | 0.0052 | SKP2,CCNA2,RBL1 |
| [hsa04114](https://www.kegg.jp/kegg-bin/show_pathway?hsa04114) | Oocyte meiosis | 3 | 1.7 | 0.0287 | AURK MYBL2A, PLK1 |
| [hsa04068](https://www.kegg.jp/kegg-bin/show_pathway?hsa04068) | FoxO signaling pathway | 2 | 1.5 | 0.0312 | SKP2,PLK1 |
|  |  |  |  |  |  |
